# Supplementary material for: Economic burden of resected squamous cell carcinoma of the head and neck in an incident cohort of patients in the UK
Source: Head Neck Oncol. 2011 Oct 28;3:47. doi: 10.1186/1758-3284-3-47 (PMC3219567; doi:10.1186/1758-3284-3-47)
Supplement: Additional file 1 — Unit costs for procedures from inpatient and outpatient care. The unit costs for the post-operative healthcare cost were based on "the national schedule of reference costs 2008--09 for NHS Trusts" and "Unit costs of health & social care 2009 " published by PSSRU. [file 1758-3284-3-47-S1.DOC]

| **Description** | **Unit Cost** | |
| --- | --- | --- |
| *Inpatient stay (per day)* |  |  |
| Other Neoplasms with length of stay 1 day or more with/without CC1 | £761 | - |
| *Secondary surgery* |  |  |
| Minor Mouth or Throat Procedures 19 years and over with/without CC1,2 | £570 | - |
| Intermediate Mouth or Throat Procedures 19 years and over with/without Major/Intermediate CC1,2 | £859 | - |
| Complex Major Mouth or Throat Procedures with/without Major/Intermediate CC1,2 | £2,933 | - |
| Minor Maxillo-facial Procedures with/without CC1,2 | £1,092 | - |
| Intermediate Maxillo-facial Procedures 19 years and over with/without CC1,2 | £1,533 | - |
| Major Maxillo-facial Procedures 19 years and over1,2 | £2,220 | - |
| Complex Major Maxillo-facial Procedures1,2 | £2,225 | - |
| Minor Head, Neck and Ear Disorders 19 years and over with/without CC1,2 | £404 | - |
| *Reconstructive* |  |  |
| Reconstruction Procedures Category 6 with/without CC1,2 | £11,367 | - |
| Reconstruction Procedures Category 41,2 | £9,518 | - |
| Reconstruction Procedures Category 21,2 | £7,647 | - |
| Reconstruction Procedures Category 1 19 years and over1,2 | £4,562 | - |
| *Chemotherapy related conditions* |  |  |
| Anemia1,2 | £973 | - |
| Neutropenia1,2 | £3,270 | - |
| Thrombocytopenia1,2 | £1,252 | - |
| Nausea/Emesis1,2 | £629 | - |
| Mucositis1,2 | £741 | - |
| Pain1,2 | £2,127 | - |
| Radiotherapy | Inpatient | outpatient |
| Deliver a fraction of Total Body Irradiation3,4 | £918 | £597 |
| Prepare for Total Body Irradiation3,4 | £1,841 | £2,433 |
| Prepare for Intracavitary Radiotherapy3,4 | £735 | £397 |
| Prepare for Interstitial Radiotherapy3,4 | £932 | £1,322 |
| Other Radiotherapy Planning3,4 | £1,055 | £271 |
| Deliver a fraction of treatment on a superficial or orthovoltage machine3,4 | £568 | £82 |
| Deliver a fraction of Intracavitary Radiotherapy with/without General  Anaesthetic3,4 | £1,879 | £448 |
| Deliver a fraction of Interstitial Radiotherapy3,4 | £1,894 | £1,580 |
| Other Radiotherapy Treatment3,4 | £2,170 | £134 |
| *Chemotherapy* |  |  |
| Procure Chemotherapy drugs for regimens in Band 15,6 | £231 | £198 |
| Procure Chemotherapy drugs for regimens in Band 25,6 | £386 | £303 |
| Procure Chemotherapy drugs for regimens in Band 35,6 | £493 | £612 |
| Procure Chemotherapy drugs for regimens in Band 45,6 | £612 | £625 |
| Procure Chemotherapy drugs for regimens in Band 55,6 | £812 | £806 |
| Procure Chemotherapy drugs for regimens in Band 65,6 | £1,004 | £928 |
| Procure Chemotherapy drugs for regimens in Band 75,6 | £1,122 | £911 |
| Procure Chemotherapy drugs for regimens in Band 85,6 | £1,065 | £1,627 |
| Procure Chemotherapy drugs for regimens in Band 95,6 | £1,256 | £2,030 |
| Procure Chemotherapy drugs for regimens in Band 105,6 | £1,773 | £2,280 |
| Deliver exclusively Oral Chemotherapy5,6 | £158 | £209 |
| Deliver simple Parenteral Chemotherapy at first attendance5,6 | £180 | £272 |
| Deliver more complex Parenteral Chemotherapy at first attendance5,6 | £213 | £447 |
| Deliver complex Chemotherapy, including prolonged infusional treatment  at first attendance5,6 | £259 | £335 |
| Deliver subsequent elements of a Chemotherapy cycle5,6 | £251 | £227 |
| Deliver chemotherapy for regimens not on the national list5,6 | £258 | £96 |
| Intravenous induction of labour7 | £11 | £11 |
| Intravenous chemotherapy7 | £11 | £11 |
| Intravenous immunotherapy7 | £11 | £11 |
| Intravenous injection of non radioactive diagnostic substance7 | £11 | £11 |
| Intravenous injection of antimicrobial therapy7 | £11 | £11 |
| Other specified other intravenous injection7 | £11 | £11 |
| Unspecified other intravenous injection7 | £11 | £11 |
| Outpatient visit | First appointment | Subsequent appointment |
| General surgery8,9 | £145 | £97 |
| Oral surgery8,9 | £123 | £86 |
| Restorative dentistry8,9 | £100 | £87 |
| Oral and maxillo facial surgery8,9 | £145 | £97 |
| Plastic surgery8,9 | £112 | £77 |
| Pain management8,9 | £163 | £103 |
| General medicine8,9 | £190 | £130 |
| Palliative medicine8,9 | £422 | £307 |
| Medical oncology8,9 | £179 | £121 |
| Radiology (radiographer)10 | £43 | £43 |

1National Schedule of Reference Costs Year: '2008—09' - NHS Trusts Non-Elective Inpatient (Long Stay) HRG Data

2National Schedule of Reference Costs Year: '2008—09' - NHS Trusts Non-Elective Inpatient (Short Stay) HRG Data

3National Schedule of Reference Costs Year: '2008—09' - NHS Trusts Radiotherapy: Inpatients

4National Schedule of Reference Costs Year: '2008—09' - NHS Trusts Radiotherapy Planning: Outpatients

5National Schedule of Reference Costs Year: '2008—09' - NHS Trusts Chemotherapy Procurement: Inpatient

6National Schedule of Reference Costs Year: '2008—09' - NHS Trusts Chemotherapy Procurement: Outpatients

7Labour cost for nurse for 30min was used in PSSRU 2009 (Table 12.4 and 12.3)

8National Schedule of Reference Costs Year: '2008—09' - Consultant Led: First Attendance Non-Admitted Face to Face

9National Schedule of Reference Costs Year: '2008—09' - Consultant Led: Follow up Attendance Non-Admitted Face to Face

10Cost for radiographer per hour of client contact in PSSRU 2009 (Table 11.5)
